# Supplementary material
Source: PubMed Central journal article supplement (PMC4010991)

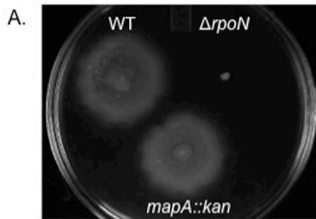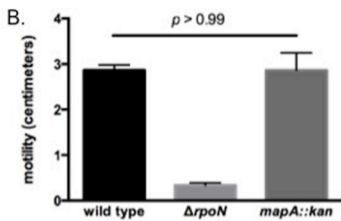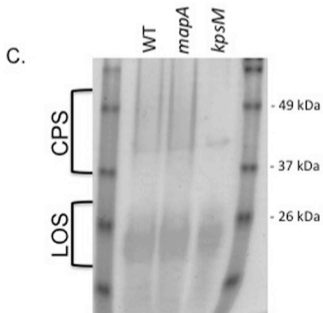

Supplement: JB.01395-13_zjb999093152so1.pdf [file JB.01395-13_zjb999093152so1.pdf]
